# Supplementary material for: Stunting, Wasting and Underweight in Sub-Saharan Africa: A Systematic Review
Source: MDPI journal article supplement (doi:10.3390/ijerph14080863), 2017-08-01
Supplement: s1 [file s1]

**Supplementary table 1:** Assessment tools used for the quality appraisal of the included studies, based on STROBE checklist.

| <b>Sample size</b>                                  | <b>Sampling methodology<br/>(Representativeness)</b>                                    | <b>Responses rate</b>                          | <b>Outcome measure</b>                                                                                                                                           | <b>Statistical analysis</b>                                                                  | <b>Confounding</b>                                                                                                                                                                                          | <b>Study limitations</b>                 | <b>Ethical considerations</b>                      |
|-----------------------------------------------------|-----------------------------------------------------------------------------------------|------------------------------------------------|------------------------------------------------------------------------------------------------------------------------------------------------------------------|----------------------------------------------------------------------------------------------|-------------------------------------------------------------------------------------------------------------------------------------------------------------------------------------------------------------|------------------------------------------|----------------------------------------------------|
| [1 point]<br>Study reported sample size calculation | [1 point]<br>Random selection from representative list of the target population         | [1 point]<br>High response rate (> 70%)        | [1 point]<br>Valid acceptable definition of malnutrition (stunting, wasting, underweight) based on either WHO growth standards or NCHS* and objectively measured | [1 point]<br>Statistical techniques and reasons for choosing techniques are fully explained. | [1 point]<br>Well adjusted (Individual, household and community level factors). Adjusted and unadjusted Odd ratio (OR) or Relative ratio (RR), confidence interval and <i>p</i> -values were well presented | [1 point]<br>Stated study limitations    | 1 [point]<br>Studies with ethical consideration    |
| [0 point]<br>No sample size calculation             | [0 point]<br>Non- random selection but from sampling frame that represent the community | [0 point]<br>Moderate/Low response rate (<70%) | [0 point]<br>No valid definition of malnutrition                                                                                                                 | [0 point]<br>Statistical techniques are not explained.                                       | [0 point]<br>Minimal adjusted for some or none of the confounders.                                                                                                                                          | [0 point]<br>No stated study limitations | [0 point]<br>Studies with no ethical consideration |

\*NCHS = National centre for health statistics
