# Supplementary material for: Stunting, Wasting and Underweight in Sub-Saharan Africa: A Systematic Review
Source: MDPI journal article supplement (doi:10.3390/ijerph14080863), 2017-08-01
Supplement: s1 [file s1]

**Supplementary table 2:** Quality assessment of included studies

| Author, Year<br>Country                       | Sample<br>size | Sampling<br>methodology<br>(Representativeness) | Response<br>rate | Outcome<br>measure | Statistical<br>analysis | Confounding | Study<br>limitations | Ethical<br>considerations | Quality<br>assessment<br>Score |
|-----------------------------------------------|----------------|-------------------------------------------------|------------------|--------------------|-------------------------|-------------|----------------------|---------------------------|--------------------------------|
| <b>WEST AFRICA</b>                            |                |                                                 |                  |                    |                         |             |                      |                           |                                |
| Akombi <i>et al.</i> 2017<br>Nigeria          | 1              | 1                                               | 1                | 1                  | 1                       | 1           | 1                    | 1                         | 8                              |
| Akombi <i>et al.</i> 2017<br>Nigeria          | 1              | 1                                               | 1                | 1                  | 1                       | 1           | 1                    | 1                         | 8                              |
| Aheto <i>et al.</i> 2015<br>Ghana             | 1              | 1                                               | 0                | 1                  | 1                       | 1           | 1                    | 0                         | 6                              |
| Ogunlesi <i>et al.</i> 2015<br>Nigeria        | 0              | 1                                               | 0                | 1                  | 0                       | 1           | 1                    | 0                         | 4                              |
| Novignon <i>et al.</i> 2015<br>Ghana          | 1              | 1                                               | 0                | 1                  | 1                       | 1           | 1                    | 0                         | 6                              |
| Balogun <i>et al.</i> 2014<br>Nigeria         | 0              | 1                                               | 0                | 0                  | 0                       | 1           | 0                    | 1                         | 3                              |
| Darteh <i>et al.</i> 2014<br>Ghana            | 1              | 0                                               | 1                | 1                  | 1                       | 1           | 1                    | 0                         | 6                              |
| Beiersmann <i>et al.</i> 2013<br>Burkina Faso | 1              | 1                                               | 0                | 1                  | 1                       | 1           | 1                    | 1                         | 7                              |
| Adekanmbi <i>et al.</i> 2013<br>Nigeria       | 1              | 1                                               | 1                | 1                  | 1                       | 1           | 1                    | 1                         | 8                              |
| Idris <i>et al.</i> 2013<br>Nigeria           | 0              | 0                                               | 0                | 0                  | 0                       | 1           | 0                    | 1                         | 2                              |
| Nikoi <i>et al.</i> 2012<br>Ghana             | 1              | 1                                               | 1                | 1                  | 1                       | 0           | 1                    | 0                         | 6                              |
| Olusanya <i>et al.</i> 2010<br>Nigeria        | 0              | 1                                               | 0                | 1                  | 1                       | 1           | 1                    | 1                         | 6                              |
| Ellen Van de Poel <i>et al.</i><br>2007 Ghana | 1              | 1                                               | 0                | 1                  | 1                       | 1           | 1                    | 0                         | 6                              |

|                                          |   |   |   |   |   |   |   |   |   |
|------------------------------------------|---|---|---|---|---|---|---|---|---|
| Odunayo <i>et al.</i> 2006<br>Nigeria    | 0 | 1 | 0 | 1 | 1 | 1 | 0 | 0 | 4 |
| Ukwuani <i>et al.</i> 2003<br>Nigeria    | 1 | 1 | 0 | 1 | 1 | 1 | 1 | 0 | 6 |
| Ojofeitimi <i>et al.</i> 2003<br>Nigeria | 1 | 1 | 0 | 0 | 0 | 1 | 0 | 0 | 3 |
| Abidoye <i>et al.</i> 2000<br>Nigeria    | 0 | 1 | 0 | 1 | 1 | 1 | 0 | 0 | 4 |
| Ighogboja <i>et al.</i> 1992<br>Nigeria  | 0 | 1 | 0 | 1 | 1 | 1 | 1 | 0 | 5 |

#### **EAST AFRICA**

|                                          |   |   |   |   |   |   |   |   |   |
|------------------------------------------|---|---|---|---|---|---|---|---|---|
| Demilew <i>et al.</i> 2017<br>Ethiopia   | 1 | 1 | 1 | 1 | 1 | 1 | 1 | 1 | 8 |
| Kinyoki <i>et al.</i> 2015<br>Somalia    | 0 | 1 | 0 | 1 | 1 | 1 | 1 | 1 | 6 |
| Yisak <i>et al.</i> 2015<br>Ethiopia     | 1 | 1 | 0 | 1 | 1 | 1 | 1 | 1 | 7 |
| Chirande <i>et al.</i> 2015<br>Tanzania  | 1 | 1 | 1 | 1 | 1 | 1 | 1 | 1 | 8 |
| Asfaw <i>et al.</i> 2015<br>Ethiopia     | 1 | 1 | 1 | 1 | 1 | 1 | 1 | 1 | 8 |
| Fekadu <i>et al.</i> 2015<br>Ethiopia    | 1 | 1 | 1 | 0 | 1 | 1 | 1 | 1 | 7 |
| Semali <i>et al.</i> 2015<br>Tanzania    | 1 | 1 | 0 | 1 | 1 | 1 | 0 | 1 | 5 |
| Alemayehu <i>et al.</i> 2015<br>Ethiopia | 1 | 1 | 1 | 1 | 0 | 1 | 1 | 1 | 7 |
| Nordang <i>et al.</i> 2015<br>Tanzania   | 1 | 1 | 1 | 1 | 1 | 1 | 1 | 1 | 8 |
| Gilbert Habaasa 2015<br>Uganda           | 0 | 1 | 0 | 1 | 1 | 1 | 1 | 1 | 6 |

|                                             |   |   |   |   |   |   |   |   |   |
|---------------------------------------------|---|---|---|---|---|---|---|---|---|
| Debale <i>et al.</i> 2014<br>Ethiopia       | 0 | 1 | 0 | 0 | 1 | 1 | 1 | 0 | 4 |
| Abubakar <i>et al.</i> 2012<br>Tanzania     | 0 | 1 | 0 | 1 | 1 | 1 | 0 | 1 | 5 |
| Abuya <i>et al.</i> 2012<br>Kenya           | 0 | 1 | 0 | 1 | 1 | 1 | 1 | 1 | 6 |
| Gewa <i>et al.</i> 2011<br>Kenya            | 1 | 1 | 1 | 1 | 1 | 1 | 1 | 0 | 7 |
| Mulugeta <i>et al.</i> 2010<br>Ethiopia     | 0 | 1 | 0 | 1 | 0 | 1 | 0 | 1 | 4 |
| Engelbrechtsen <i>et al.</i> 2008<br>Uganda | 0 | 1 | 0 | 1 | 1 | 1 | 1 | 1 | 6 |
| Nyaruhucha <i>et al.</i> 2006<br>Tanzania   | 1 | 1 | 0 | 0 | 0 | 1 | 0 | 0 | 3 |
| Bloss <i>et al.</i> 2004<br>Kenya           | 0 | 0 | 0 | 1 | 1 | 1 | 1 | 0 | 4 |
| Wamani <i>et al.</i> 2004<br>Uganda         | 1 | 1 | 0 | 1 | 1 | 1 | 1 | 1 | 7 |
| Kikafunda <i>et al.</i> 1998<br>Uganda      | 0 | 1 | 0 | 1 | 1 | 1 | 0 | 0 | 4 |
| Getaneh <i>et al.</i> 1998<br>Ethiopia      | 0 | 1 | 0 | 1 | 1 | 1 | 1 | 1 | 6 |
| Vella <i>et al.</i> 1995<br>Uganda          | 0 | 1 | 0 | 1 | 1 | 1 | 0 | 0 | 4 |
| Mbago <i>et al.</i> 1992<br>Tanzania        | 0 | 1 | 0 | 0 | 1 | 1 | 0 | 0 | 3 |

#### SOUTHERN AFRICA

|                                              |   |   |   |   |   |   |   |   |   |
|----------------------------------------------|---|---|---|---|---|---|---|---|---|
| Lesiapeto <i>et al.</i> 2010<br>South Africa | 0 | 1 | 0 | 1 | 1 | 1 | 1 | 1 | 6 |
|----------------------------------------------|---|---|---|---|---|---|---|---|---|

|                                           |   |   |   |   |   |   |   |   |   |
|-------------------------------------------|---|---|---|---|---|---|---|---|---|
| Willey <i>et al.</i> 2009<br>South Africa | 0 | 0 | 0 | 1 | 1 | 1 | 0 | 1 | 4 |
| Chopra <i>et al.</i> 2003<br>South Africa | 0 | 1 | 0 | 1 | 1 | 1 | 0 | 0 | 4 |
| Tharakan <i>et al.</i> 1999<br>Botswana   | 0 | 1 | 0 | 1 | 1 | 1 | 0 | 0 | 4 |

#### CENTRAL AFRICA

|                                         |   |   |   |   |   |   |   |   |   |
|-----------------------------------------|---|---|---|---|---|---|---|---|---|
| Nagahori <i>et al.</i> 2015<br>Cameroun | 0 | 1 | 0 | 1 | 1 | 1 | 1 | 1 | 6 |
| Nolla <i>et al.</i> 2014<br>Cameroun    | 1 | 1 | 0 | 1 | 1 | 0 | 1 | 1 | 6 |
| Mukatay <i>et al.</i> 2010<br>DRC*      | 0 | 0 | 0 | 1 | 1 | 1 | 0 | 1 | 4 |
| Delpeuch <i>et al.</i> 1999<br>DRC*     | 0 | 1 | 0 | 1 | 1 | 1 | 0 | 0 | 4 |

\*DRC = Democratic Republic of Congo
